# Supplementary material for: Whole genome sequencing analysis of SARS-CoV-2 from Malaysia: From alpha to Omicron
Source: PubMed Central journal article supplement (PMC9537942; doi:10.3389/fmed.2022.1001022), 2022-09-23
Supplement: Table_3.pdf [file Table_3.pdf]

**Supplementary Table 3**

| <b>Lineages in Malaysia</b> | <b>Total number of sequences</b> |
|-----------------------------|----------------------------------|
| A                           | 3                                |
| A.23.1                      | 1                                |
| AU.2                        | 452                              |
| AU.3                        | 2                                |
| AY.100                      | 9                                |
| AY.102                      | 1                                |
| AY.103                      | 3                                |
| AY.106                      | 2                                |
| AY.109                      | 2                                |
| AY.111                      | 7                                |
| AY.112                      | 5                                |
| AY.112.2                    | 3                                |
| AY.114                      | 16                               |
| AY.119                      | 2                                |
| AY.120                      | 10                               |
| AY.121                      | 2                                |
| AY.122                      | 16                               |
| AY.124                      | 1                                |
| AY.124.1.1                  | 1                                |
| AY.125                      | 1                                |
| AY.126                      | 1                                |
| AY.127                      | 14                               |
| AY.127.2                    | 1                                |
| AY.129                      | 3                                |
| AY.131                      | 1                                |
| AY.132                      | 1                                |
| AY.19                       | 18                               |
| AY.23                       | 2448                             |
| AY.23.1                     | 16                               |
| AY.24                       | 98                               |
| AY.26                       | 2                                |
| AY.29.1                     | 1                                |
| AY.32                       | 1                                |
| AY.33                       | 1                                |
| AY.36                       | 4                                |
| AY.39                       | 4                                |
| AY.4                        | 7                                |
| AY.4.2                      | 3                                |
| AY.4.2.1                    | 1                                |
| AY.4.2.2                    | 1                                |
| AY.4.5                      | 1                                |
| AY.4.7                      | 1                                |
| AY.43                       | 10                               |
| AY.44                       | 1                                |
| AY.45                       | 3                                |

|            |      |
|------------|------|
| AY.46      | 1    |
| AY.5       | 33   |
| AY.54      | 3    |
| AY.59      | 2504 |
| AY.61      | 1    |
| AY.75      | 20   |
| AY.76      | 294  |
| AY.79      | 1566 |
| AY.84      | 3    |
| AY.85      | 10   |
| AY.86      | 3    |
| AY.95      | 2    |
| B          | 28   |
| B.1        | 53   |
| B.1.1      | 7    |
| B.1.260    | 1    |
| B.1.36     | 2    |
| B.1.36.8   | 1    |
| B.1.36.16  | 83   |
| B.1.36.19  | 2    |
| B.1.178    | 1    |
| B.1.250    | 1    |
| B.1.351    | 327  |
| B.1.351.3  | 2    |
| B.1.351.5  | 1    |
| B.1.459    | 1    |
| B.1.466    | 1    |
| B.1.466.2  | 186  |
| B.1.468    | 2    |
| B.1.470    | 41   |
| B.1.524    | 575  |
| B.1.525    | 4    |
| B.1.617.1  | 4    |
| B.1.617.2  | 200  |
| B.1.1.1    | 1    |
| B.1.1.7    | 34   |
| B.1.1.63   | 6    |
| B.1.1.312  | 1    |
| B.1.1.354  | 20   |
| B.1.1.398  | 1    |
| B.1.177.77 | 1    |
| B.1.428.3  | 3    |
| B.12       | 2    |
| B.28       | 1    |
| B.3        | 1    |
| B.56       | 1    |
| B.6        | 53   |
| B.6.1      | 34   |

|           |      |
|-----------|------|
| B.6.2     | 16   |
| B.6.6     | 11   |
| BA.1      | 244  |
| BA.1.1    | 2581 |
| BA.1.1.1  | 9    |
| BA.1.1.13 | 1    |
| BA.1.1.14 | 4    |
| BA.1.1.15 | 5    |
| BA.1.1.18 | 1    |
| BA.1.1.7  | 6    |
| BA.1.10   | 1    |
| BA.1.13   | 2    |
| BA.1.13.1 | 14   |
| BA.1.14   | 2    |
| BA.1.15   | 22   |
| BA.1.15.1 | 6    |
| BA.1.16   | 2    |
| BA.1.17   | 15   |
| BA.1.17.2 | 51   |
| BA.1.18   | 39   |
| BA.1.20   | 1    |
| BA.1.21   | 1    |
| BA.2      | 4008 |
| BA.2.1    | 3    |
| BA.2.10   | 368  |
| BA.2.10.1 | 23   |
| BA.2.12   | 5    |
| BA.2.17   | 1    |
| BA.2.18   | 2    |
| BA.2.23   | 421  |
| BA.2.24   | 1    |
| BA.2.27   | 5    |
| BA.2.3    | 1500 |
| BA.2.3.2  | 2    |
| BA.2.3.3  | 2    |
| BA.2.31   | 3    |
| BA.2.32   | 81   |
| BA.2.4    | 5    |
| BA.2.5    | 10   |
| BA.2.9    | 15   |
| BA.3      | 6    |
| C.36      | 3    |
| P.2       | 1    |
| P.3       | 10   |
